# Supplementary material for: (TeCl)4(TiCl4) with isolated Te4Cl16 and TiCl4 molecules and second-harmonic-generation
Source: Royal Society of Chemistry journal article supplement (doi:10.1039/d4dt00284a), 2024-01-01
Supplement: d4dt00284a1.pdf [file d4dt00284a1.pdf]

# **ELECTRONIC SUPPORTING INFORMATION**

## **(ESI)**

### **(TeCl<sub>4</sub>)<sub>4</sub>(TiCl<sub>4</sub>) with Isolated Te<sub>4</sub>Cl<sub>16</sub> and TiCl<sub>4</sub> Molecules and Second-Harmonic-Generation**

**Maxime A. Bonnin<sup>†</sup>, Klaus Beier<sup>†</sup>, Lkhamsuren Bayarjargal<sup>‡</sup>, Björn Winkler<sup>‡\*</sup>,  
and Claus Feldmann<sup>†\*</sup>**

*<sup>†</sup>Institute for Inorganic Chemistry (IAC), Karlsruhe Institute of Technology (KIT), Engesserstraße  
15, D-76131 Karlsruhe (Germany), E-mail: claus.feldmann@kit.edu*

*<sup>‡</sup>Institute of Geosciences, Goethe University Frankfurt, Altenhoferallee 1, D-60438 Frankfurt a. M.  
(Germany), E-mail: b.winkler@kristall.uni-frankfurt.de*

#### **Content**

- 1. Analytical Techniques**
- 2. Material Characterization**
- 3. Calculations**

## 1. Analytical Techniques

*X-ray powder diffraction (XRD).* X-ray powder diffraction analysis (XRD) of  $(\text{TeCl}_4)_4(\text{TiCl}_4)$  was performed on a Stoe Stadi-P diffractometer (Stoe, Germany) using  $\text{Cu-K}\alpha$  radiation ( $\lambda = 154.06 \text{ pm}$ ) with a Ge-monochromator. Rietveld refinements were performed with the program TOPAS-Academic (Version 5), using the *cif*-data to confirm the phase purity of the title compound. The refinement was carried out by a simple axial model.

*Fourier-transform infrared (FT-IR)* spectra of  $(\text{TeCl}_4)_4(\text{TiCl}_4)$  was recorded on a Bruker Vertex 70 FT-IR spectrometer (Bruker, Germany). The samples were measured in reflection with a Platinum A 225 ATR unit.

*Thermogravimetry (TG)* of  $(\text{TeCl}_4)_4(\text{TiCl}_4)$  was carried out on a Netzsch STA 449 F3 Jupiter device (Netzsch, Germany), using  $\alpha\text{-Al}_2\text{O}_3$  as a crucible material and reference. Buoyancy effects were corrected by baseline subtraction based on a blank measurement. The samples were measured under dried nitrogen up to  $1200 \text{ }^\circ\text{C}$  with a heating rate of  $5 \text{ K/min}$ . The Netzsch software PROTEUS Thermal Analysis (Version 5.2.1) was used for graphical illustration.

## 2. Material Characterization

The crystallographic data and refinement details of  $(\text{TeCl}_4)_4(\text{TiCl}_4)$  are listed in Table S1. The data of the Rietveld refinement are summarized in Table S2. The unit cell of  $(\text{TeCl}_4)_4(\text{TiCl}_4)$  is shown in Figure S1.

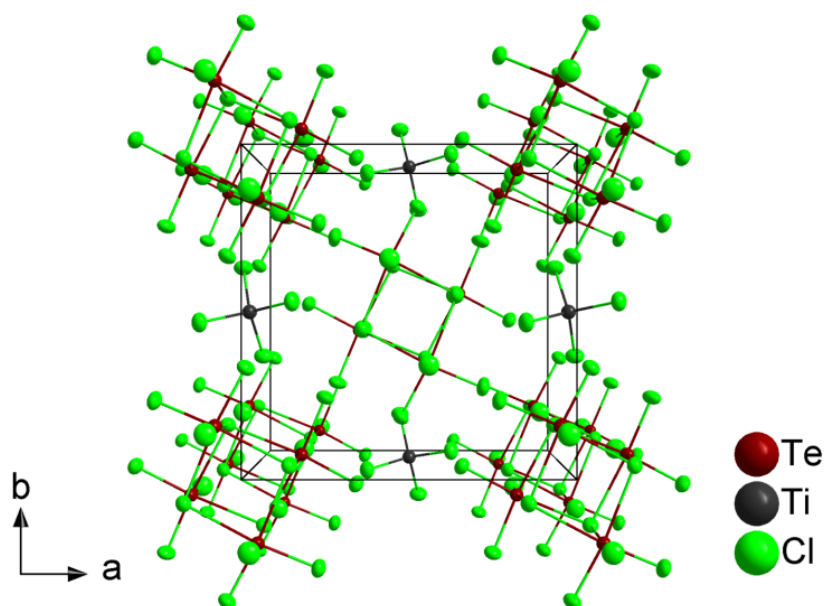

**Figure S1.** Unit cell of  $(\text{TeCl}_4)_4(\text{TiCl}_4)$ .

**Table S1.** Crystallographic data and refinement details of  $(\text{TeCl}_4)_4(\text{TiCl}_4)$  (recorded at 210 K).

| <b>Compound</b>                                         | <b><math>(\text{TeCl}_4)_4(\text{TiCl}_4)</math></b> |
|---------------------------------------------------------|------------------------------------------------------|
| W ( $\text{g}\cdot\text{mol}^{-1}$ )                    | 1267.30                                              |
| Space group                                             | $\bar{I}4$                                           |
| Flack parameter                                         | 0.50(4)                                              |
| <i>a</i> (pm)                                           | 1210.4(2)                                            |
| <i>c</i> (pm)                                           | 1015.2(2)                                            |
| V ( $10^6 \text{ pm}^3$ )                               | 1487.2(4)                                            |
| Z                                                       | 2                                                    |
| $\rho_{\text{calc.}}$ ( $\text{g}\cdot\text{cm}^{-3}$ ) | 2.83                                                 |
| $\mu$ ( $\text{mm}^{-1}$ )                              | 5.93                                                 |
| $\lambda(\text{Mo-K}\alpha)$ (pm)                       | 71.073                                               |
| T (K)                                                   | 210                                                  |
| Observed reflections                                    | 3863                                                 |
| Independent reflections                                 | 1960                                                 |
| $R_1$ ( $I \geq 2\sigma_I$ )                            | 0.0191                                               |
| $R_1$ (all data)                                        | 0.0211                                               |
| $wR_2$ ( $I \geq 2\sigma_I$ )                           | 0.0435                                               |
| $wR_2$ (all data)                                       | 0.0438                                               |
| Goof                                                    | 0.997                                                |

**Table S2.** Rietveld refinement details of  $(\text{TeCl}_4)_4(\text{TiCl}_4)$  (recorded at 20 °C)

| <b>Compound</b> | <b><math>(\text{TeCl}_4)_4(\text{TiCl}_4)</math></b> |
|-----------------|------------------------------------------------------|
| <i>a</i> (pm)   | 1222.2                                               |
| <i>c</i> (pm)   | 1013.8                                               |
| $R_{\text{wp}}$ | 0.0183                                               |

In regard of the body-centred cubic (*bcc*) packing of  $(\text{TeCl}_4)_4$  with  $\text{TiCl}_4$  in half of the tetrahedral voids (Figure S2), it must be noticed that these tetrahedral voids are distorted as not all edges have the same length.<sup>S1</sup> Compressing a single axis to a tetragonal lattice changes the distortion so that all edges of the tetrahedra become identical (995.1(1) pm). The distortion is related to angles of 98.6(1)° being much smaller than the tetrahedral angle (109.5°). The distance between the center of the  $\text{TiCl}_4$  tetrahedra and the tetrahedral corners is 656.2(1) pm.

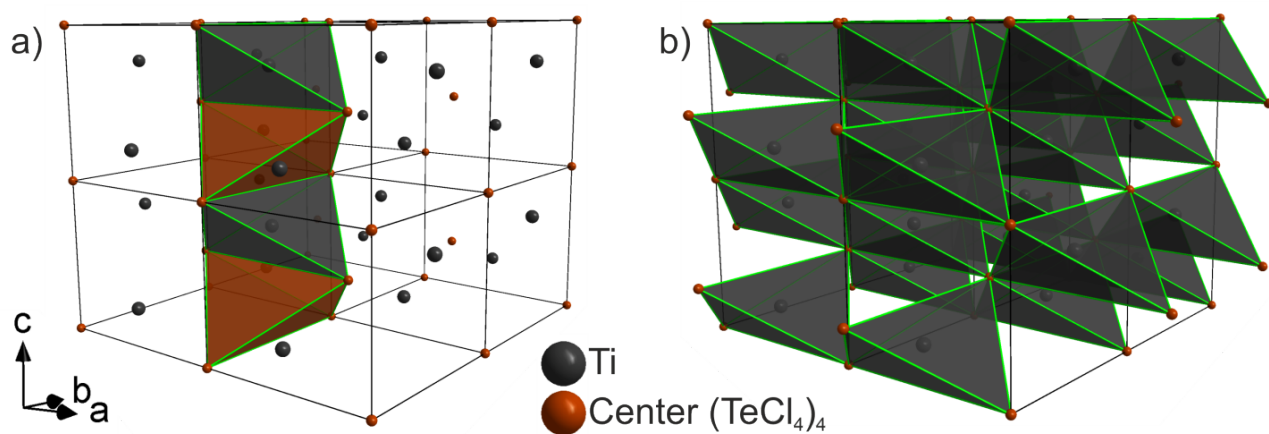

**Figure S2.** Reduced building units of  $(\text{TeCl}_4)_4(\text{TiCl}_4)$  in a  $(2 \times 2 \times 2)$  supercell showing (a) selected and (b) all occupied tetrahedral voids.

The purity of  $(\text{TeCl}_4)_4(\text{TiCl}_4)$  was confirmed by X-ray powder diffraction with Rietveld refinement (*see main paper: Figure 2*), Fourier-transform infrared (FT-IR) spectroscopy (*see main paper: Figure 4a*) and thermogravimetry (TG, Figure S3a) and differential thermal analysis (DTA, Figure S3b). Thermally, the title compound shows three-step decomposition with the first step at 100-150 °C with 14 % mass loss, the second step at 200-400 °C with a mass loss of 82 %, and the third step beginning at 700 °C with a mass loss of 4 %. These mass losses can be attributed to the sublimation of  $\text{TiCl}_4$  (calculated: 15 %) and the sublimation of  $\text{TeCl}_4$  (calculated: 85 %). The third minor mass loss of 4 % can be ascribed to the sublimation of elemental tellurium as an impurity, which was already indicated by XRD (*see main paper: Figure 2*).

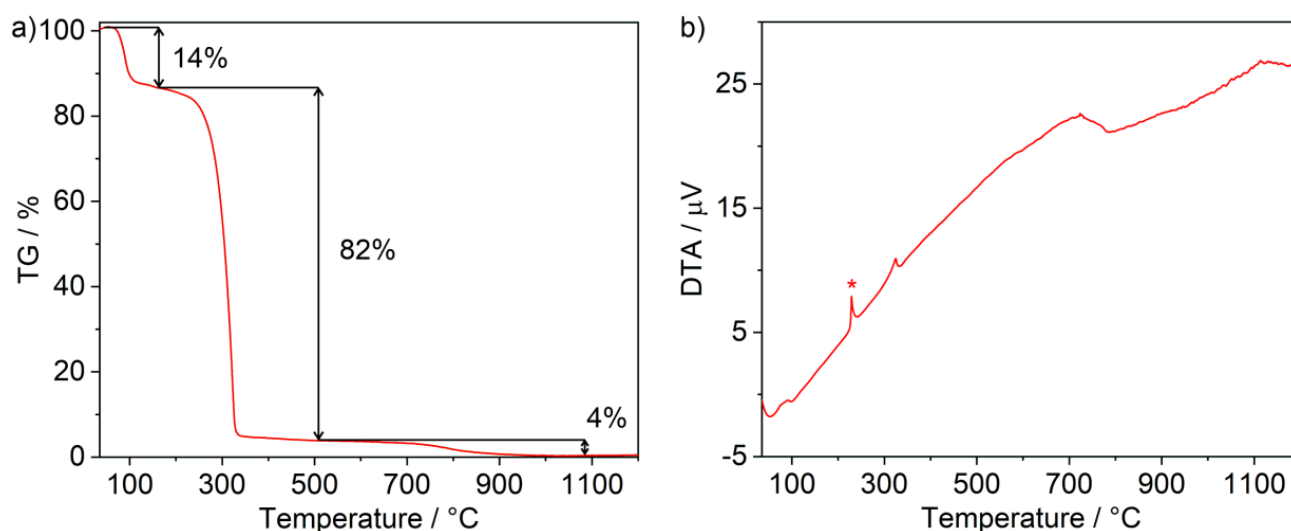

**Figure S3.** Thermal properties of  $(\text{TeCl}_4)_4(\text{TiCl}_4)$ : a) TG and b) DTA (\*melting point of  $\text{TeCl}_4$ ).

### 3. Calculations

Atomistic model calculations were carried out within the framework of DFT<sup>S2</sup> and the pseudopotential method using the CASTEP simulation package.<sup>S3</sup> Norm-conserving pseudopotentials were generated “on the fly” using the parameters provided with the CASTEP distribution. These pseudopotentials have been extensively tested for accuracy and transferability.<sup>S4</sup> The pseudopotentials were employed in conjunction with plane waves up to a kinetic energy cutoff of 630 eV. The calculations were carried out with the PBE exchange-correlation functional.<sup>S5</sup> Monkhorst-Pack grids<sup>S6</sup> were used for Brillouin zone integrations with a distance of  $< 0.025 \text{ \AA}^{-1}$  between grid points. A dispersion correction according to Grimme *et al.* was used.<sup>S7</sup> Convergence criteria included an energy change of  $< 5 \times 10^{-6} \text{ eV/atom}$ , a maximal force of  $< 0.008 \text{ eV/\AA}$ , and a maximal deviation of the stress tensor  $< 0.02 \text{ GPa}$  from the imposed stress tensor. Optical properties were computed as described by Refson *et al.*<sup>S8</sup> Phonon frequencies were obtained from density functional perturbation theory (DFPT) calculations. Raman intensities and NLO properties were computed using DFPT with the ‘2n+1’ theorem approach.<sup>S9</sup> It should be stressed that all calculations were carried out in the athermal limit, i.e., the influence of temperature and zero-point motion were not taken into account.

Band structure calculations resulted in a band gap of 2.9 eV. However, the apparent agreement with the experimentally determined optical band gap of 2.8 eV (*see main paper: Figure 5*) is somewhat fortuitous as DFT-GGA-PBE calculations are known to underestimate the band gap systematically. The top-most valence bands and the lower-most conduction bands are nearly dispersionless.

### References

- S1 C. E. Mortimer and U. Müller, *Chemie - Das Basiswissen der Chemie*. Thieme, Stuttgart 2003.
- S2 P. Hohenberg and W. Kohn, *Phys. Rev. B*, 1964, **136**, 864-871.
- S3 S. J. Clark, M. D. Segall, C. J. Pickard, P. J. Hasnip, M. J. Probert, K. Refson and M. C. Payne, *Z. Kristallogr.*, 2005, **220**, 567-570.
- S4 J. P. Perdew, K. Burke and M. Ernzerhof, *Phys. Rev. Lett.*, 1996, **77**, 3865-3868.
- S5 K. Lejaeghere, G. Bihlmayer, T. Björkman, P. Blaha, S. Blügel, V. Blum, D. Caliste, et al. *Science*, 2016, **351**, aad3000-1-aad3000-7.
- S6 H. J. Monkhorst and J. D. Pack, *Phys. Rev. B*, 1976, **13**, 5188-5192.
- S7 S. Grimme, J. Antony, S. Ehrlich and H. Krieg, *J. Chem. Phys.*, 2010, **132**, 154104(1-19).
- S8 K. Refson, P. R. Tulip and S. J. Clark, *Phys. Rev. B*, 2006, **73**, 155114(1-12).
- S9 K. Miwa, *Phys. Rev. B*, 2011, **84**, 094304(1-13).
